# Supplementary material for: Extent of Cardiac Damage and Mortality in Patients Undergoing Transcatheter Aortic Valve Implantation
Source: MDPI journal article supplement (doi:10.3390/jcm10194563), 2021-09-30
Supplement: s1 [file s1]

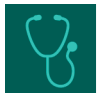

---

## Extent of cardiac damage and mortality in patients undergoing transcatheter aortic valve implantation

### Supplemental Material

#### TABLE OF CONTENTS

- Supplemental Table S1. Prevalence of cardiac damage stages and their individual components in study population 2
- Supplemental Table S2. Procedural data 3
- Supplemental Table S3. Echocardiographic parameters according to stage of cardiac damage at baseline, discharge and 30-day after TAVI 4
- Supplemental Table S4. Multivariable model 4
- Supplemental Figure S1. Staging of cardiac damage in patients with aortic stenosis 5

**Table S1.** Prevalence of cardiac damage stages and their individual components in study population.

| <b>Stages of Cardiac Damage</b>                                                               |                 |
|-----------------------------------------------------------------------------------------------|-----------------|
| Stage 0 No extravalvular cardiac damage                                                       | 4/262 (1.4%)    |
| Stage 1 Left ventricular damage                                                               | 19/262 (7.2%)   |
| Stage 2 Left atrial or mitral valve damage                                                    | 106/262 (40.4%) |
| Stage 3 Pulmonary vasculature or tricuspid valve damage                                       | 59/262 (22.7%)  |
| Stage 4 Right ventricular damage                                                              | 74/262 (28.3%)  |
| Individual component of stages of cardiac damage                                              |                 |
| STAGE 0                                                                                       |                 |
| STAGE 1                                                                                       |                 |
| LV hypertrophy (LV mass index > 95 g/m <sup>2</sup> for women, >115 g/m <sup>2</sup> for men) | 228/262 (87%)   |
| LVEF <50%                                                                                     | 57/262 (21.8%)  |
| GLS <-20%                                                                                     | 140/262 (53.5%) |
| E/e' ratio >14                                                                                | 154/262 (58.8%) |
| STAGE 2                                                                                       |                 |
| Left atrial volume index (LAVI) >34 mL/                                                       | 227/262 (86.6%) |
| Moderate/severe mitral valve regurgitation                                                    | 118/262 (45%)   |
| Atrial fibrillation                                                                           | 67/262 (25.6%)  |
| STAGE 3                                                                                       |                 |
| Systolic pulmonary artery pressure ≥60 mmHg                                                   | 43/262 (16%)    |
| Moderate/severe tricuspid valve regurgitation                                                 | 106/262 (40.5%) |
| STAGE 4                                                                                       |                 |
| Tricuspid annular plane systolic excursion (TAPSE) < 17 mm                                    | 56/262 (21.4%)  |
| Right ventricular basal diameter (RVBD) > 42 mm                                               | 33/262 (12.6%)  |

Table S2. Procedural data.

|                                          | N = 262       | Stage 0/1<br>(n = 23) | Stage 2<br>(n = 106) | Stage 3<br>(n = 59) | Stage 4<br>(n = 74) |
|------------------------------------------|---------------|-----------------------|----------------------|---------------------|---------------------|
| Indication to TAVI                       |               |                       |                      |                     |                     |
| High-flow, high-gradient symptomatic AS  | 246 (93.8%)   | 21 (91.3%)            | 102 (96.2%)          | 58 (98.3%)          | 65 (87.8%)          |
| Low-flow low-gradient AS                 | 16 (6.2%)     | 2 (8.7%)              | 4 (3.8%)             | 1 (1.7%)            | 9 (12.2%)           |
| Access site                              |               |                       |                      |                     |                     |
| Percutaneous transfemoral                | 255 (97.3%)   | 22 (95.6%)            | 104 (98.1%)          | 57 (96.6%)          | 72 (97.3%)          |
| Surgical transfemoral                    | 3 (1.2%)      | 1 (4.4%)              | 0                    | 0                   | 2 (2.7%)            |
| Other                                    | 4 (1.5%)      | 0                     | 2 (1.9%)             | 2 (3.4%)            | 0                   |
| Valve prosthesis                         |               |                       |                      |                     |                     |
| Medtronic Evolut R                       | 147 (56.1%)   | 12 (52.2%)            | 61 (57.5%)           | 39 (66.1%)          | 35 (47.3%)          |
| Medtronic Corevalve                      | 45 (17.2%)    | 3 (13%)               | 11 (10.4%)           | 12 (20.3%)          | 19 (25.7%)          |
| Edwards Sapien 3                         | 49 (18.7%)    | 7 (30.4%)             | 22 (20.8%)           | 6 (10.2%)           | 14 (18.9%)          |
| Edwards Sapien XT                        | 2 (0.8%)      | 1 (4.4%)              | 0                    | 0                   | 1 (1.3%)            |
| Symetis Acurate Neo                      | 14 (5.3%)     | 0                     | 9 (8.5%)             | 11 (1.7%)           | 4 (5.4%)            |
| St Jude Portico                          | 3 (1.1%)      | 0                     | 2 (1.9%)             | 1 (1.7%)            | 0                   |
| Other                                    | 2 (0.8%)      | 0                     | 1 (0.9%)             | 0                   | 1 (1.3%)            |
| Procedural details                       |               |                       |                      |                     |                     |
| Ballon aortic valvuloplastic             | 82 (31.3%)    | 6 (26.1%)             | 32 (30.2%)           | 12 (20.3%)          | 32 (43.2%)          |
| Post-dilatation                          | 26 (9.9%)     | 2 (8.7%)              | 8 (7.5%)             | 7 (11.9%)           | 9 (12.2%)           |
| Rapid pacing                             | 133 (50.7%)   | 14 (60.9%)            | 53 (50%)             | 26 (44.1%)          | 40 (54.0%)          |
| Procedural time (min)                    | 105.93 ± 47.8 | 115.6 ± 43.0          | 102.0 ± 40.2         | 107.6 ± 103.3       | 107.2 ± 30.7        |
| Fluoroscopy time (min)                   | 29.86 ± 13.7  | 30.3 ± 11.7           | 29.5 ± 11.9          | 29.9 ± 16.5         | 30.2 ± 10.7         |
| Contrast volume (ml)                     | 236.1 ± 113.6 | 239.3 ± 98.5          | 236.8 ± 126.7        | 245.2 ± 123.2       | 226.9 ± 109         |
| Concomitant procedures                   |               |                       |                      |                     |                     |
| Percutaneous coronary intervention (PCI) | 24 (9.2%)     | 1 (4.4%)              | 11 (10.4%)           | 5 (8.5%)            | 7 (9.5%)            |
| Other procedures                         | 15 (5.7%)     | 1 (4.4%)              | 7 (6.6%)             | 4 (6.8%)            | 3 (4.0%)            |
| Procedural success (VARC2)               | 258 (98.5%)   | 23 (100%)             | 105 (99%)            | 59 (100%)           | 71 (95.9%)          |
| Complications                            | 18 (6.8%)     | 1 (4.4%)              | 8 (7.5%)             | 5 (8.5%)            | 4 (5.4%)            |
| Death                                    | 2 (0.8%)      | 0                     | 1 (0.9%)             | 0                   | 1 (1.3%)            |
| Conversion to cardiac surgery            | 2 (0.8%)      | 0                     | 2 (1.9%)             | 0                   | 0                   |
| Ventricular wall perforation             | 2 (0.8%)      | 0                     | 1 (0.9%)             | 0                   | 1 (1.3%)            |
| Mitral valve dysfunction                 | 1 (0.4%)      | 0                     | 1 (0.9%)             | 0                   | 0                   |
| Cardiac tamponade                        | 4 (1.5%)      | 0                     | 2 (1.9%)             | 1 (1.7%)            | 1 (1.3%)            |
| Valve migration                          | 0 (0%)        | 0                     | 0                    | 0                   | 0                   |
| Valve embolization                       | 1 (0.4%)      | 0                     | 0                    | 0                   | 1 (1.3%)            |
| Transitory atrioventricular block        | 7 (2.7%)      | 1 (4.4%)              | 3 (2.8%)             | 22 (3.4%)           | 1 (1.3%)            |
| Other                                    | 7 (2.7%)      | 1 (4.4%)              | 1 (0.9%)             | 2 (3.4%)            | 3 (4.0%)            |
| ICU length of stay                       | 3.5 ± 2.4     | 3.5 ± 2.8             | 3.6 ± 4.7            | 3.7 ± 2.9           | 3.6 ± 2.9           |
| Red blood cell transfusion               | 69 (26.3%)    | 3 (13%)               | 26 (24.5%)           | 14 (23.7%)          | 26 (35.1%)          |

**Table S3.** Echocardiographic parameters according to stage of cardiac damage at baseline, discharge and 30-day after TAVI.

|                         | Stage 0/1 (n = 23) | Stage 2 (n =106) | Stage 3 (n = 59) | Stage 4 (n = 74) | p-Value |
|-------------------------|--------------------|------------------|------------------|------------------|---------|
| Baseline                |                    |                  |                  |                  |         |
| LVEF, %                 | 62.6 ± 7.9         | 58 ± 7.7         | 54 ± 13.2        | 50.7 ± 13.1      | 0.003   |
| LVGLS, %                | 19.1 ± 1.6         | 17.5 ± 2.7       | 17 ± 4           | 17 ± 4.3         | 0.329   |
| E/E'ratio               | 13.3 ± 3.7         | 14.7 ± 5.2       | 17.2 ± 4.3       | 18.8 ± 8.5       | 0.006   |
| LAVI, mL/m <sup>2</sup> | 29.2 ± 2.8         | 51 ± 12.8        | 55 ± 14.7        | 63.6 ± 15.2      | <0.001  |
| PAPS, mmHg              | 37.6 ± 8           | 36.9 ± 7.2       | 48.4 ± 12        | 50.1 ± 12.1      | <0.001  |
| TAPSE, mm               | 22.7 ± 4.3         | 21.3 ± 3.4       | 21.3 ± 4.3       | 17.9 ± 5.3       | <0.001  |
| Discharge               |                    |                  |                  |                  |         |
| LVEF, %                 | 58.2 ± 6.7         | 56.7 ± 6.1       | 55.9 ± 8.7       | 52.4 ± 10.5      | 0.064   |
| LVGLS, %                | 20 ± 1.1           | 18.6 ± 2.1       | 18 ± 2.8         | 18.2 ± 3.5       | 0.14    |
| E/E'ratio               | 14.4 ± 4.9         | 15.7 ± 5.7       | 18 ± 5.8         | 18.3 ± 7.1       | 0.082   |
| LAVI, mL/m <sup>2</sup> | 31.7 ± 5           | 47.6 ± 14        | 53.7 ± 17        | 60.7 ± 16.1      | <0.001  |
| PAPS, mmHg              | 36.4 ± 8.8         | 38.9 ± 7.8       | 42.6 ± 9.2       | 46.1 ± 12.9      | 0.003   |
| TAPSE, mm               | 21 ± 2.4           | 20.7 ± 3.3       | 21 ± 3.1         | 19.3 ± 3.2       | 0.09    |
| 30-day                  |                    |                  |                  |                  |         |
| LVEF, %                 | 62.2 ± 4.9         | 59.5 ± 6.2       | 57.8 ± 8.3       | 56.3 ± 7.5       | 0.048   |
| LVGLS, %                | 21.6 ± 1.1         | 20.1 ± 2.3       | 18.8 ± 3.6       | 19.8 ± 3.5       | 0.039   |
| E/E'ratio               | 11.8 ± 2.2         | 12.9 ± 4.5       | 13.9 ± 4.9       | 14.4 ± 4.2       | 0.24    |
| LAVI, mL/m <sup>2</sup> | 29.4 ± 3.7         | 42.6 ± 14        | 49.8 ± 16        | 55.4 ± 14.6      | <0.001  |
| PAPS, mmHg              | 31.8 ± 5.1         | 34.3 ± 5.4       | 41.2 ± 11        | 40.8 ± 11.1      | <0.001  |
| TAPSE, mm               | 23.6 ± 3.1         | 22.1 ± 3         | 21.9 ± 3.1       | 21.6 ± 3         | 0.259   |

**Table S4.** Multivariable model.

|                         | Hazard Ratio | Standard Error | 95% Confidence Intervals | p-Value |
|-------------------------|--------------|----------------|--------------------------|---------|
| Stage of cardiac damage | 1.75         | 0.35           | 1.17–2.60                | 0.006   |
| NYHA class              | 1.73         | 0.67           | 0.81–3.71                | 0.159   |
| Fraility                | 6.16         | 3.90           | 1.77–21.37               | 0.004   |
| STS score               | 1.04         | 0.03           | 0.97–1.11                | 0.231   |
| Hypertension            | 2.58         | 6.55           | 0                        | 1.0     |
| Dyslipidemia            | 1.53         | 0.60           | 0.71–3.31                | 0.283   |

| 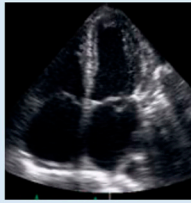 |                                                                                                                                                                                                                                                                             |                                                                                                                               |                                                                                           |  |
|-----------------------------------------------------------------------------------|--------------------------------------------------------------------------------------------------------------------------------------------------------------------------------------------------------------------------------------------------------------------------------------------------------------------------------------------------------------|----------------------------------------------------------------------------------------------------------------------------------------------------------------------------------------------------------------|-----------------------------------------------------------------------------------------------------------------------------------------------------------------------------|-------------------------------------------------------------------------------------|
| Stage 0                                                                           | Stage 1                                                                                                                                                                                                                                                                                                                                                      | Stage 2                                                                                                                                                                                                        | Stage 3                                                                                                                                                                     | Stage 4                                                                             |
| No cardiac damage                                                                 | Left ventricular damage                                                                                                                                                                                                                                                                                                                                      | Left atrial or mitral damage                                                                                                                                                                                   | Pulmonary vasculature or tricuspid damage                                                                                                                                   | Right ventricular damage                                                            |
|                                                                                   | <ul style="list-style-type: none"> <li>• LV hypertrophy: LV mass index <math>&gt;95</math> g/m<sup>2</sup> ♀, <math>&gt;115</math> g/m<sup>2</sup> ♂</li> <li>• Severe LV diastolic dysfunction (<math>E/e' &gt;14</math>)</li> <li>• LV systolic dysfunction (LV ejection fraction <math>&lt;50\%</math>)</li> <li>• LVGLS <math>&lt;20\%</math></li> </ul> | <ul style="list-style-type: none"> <li>• LA enlargement (LA volume <math>&gt;34</math> ml/m<sup>2</sup>)</li> <li>• Presence of atrial fibrillation</li> <li>• Moderate-severe mitral regurgitation</li> </ul> | <ul style="list-style-type: none"> <li>• Systolic pulmonary arterial pressure <math>\geq 60</math> mmHg</li> <li>• Moderate/severe tricuspid valve regurgitation</li> </ul> | <ul style="list-style-type: none"> <li>• TAPSE <math>&lt;17</math> mm</li> </ul>    |

**Figure S1.** Staging of cardiac damage in patients with aortic stenosis.
